# Supplementary material for: 2-Methoxyestradiol as an Antiproliferative Agent for Long-Term Estrogen-Deprived Breast Cancer Cells
Source: MDPI journal article supplement (doi:10.3390/cimb45090464), 2023-09-09
Supplement: s1 [file s1]

Supplementary figures

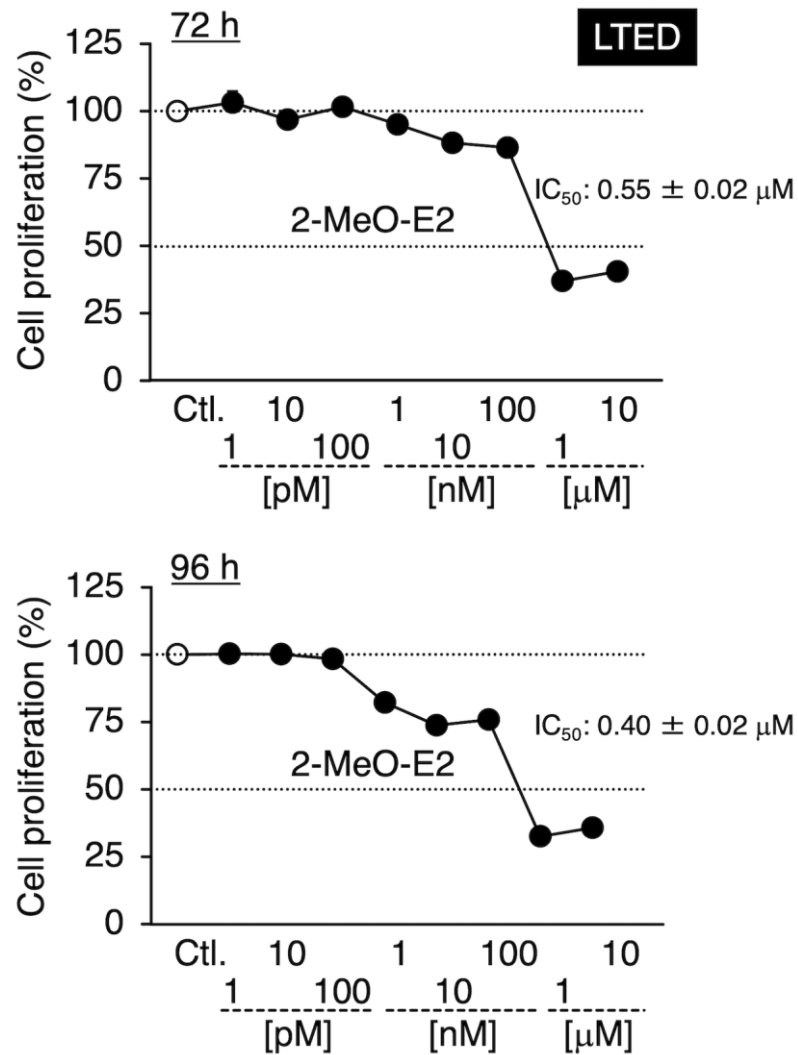

**Figure S1.** Effect of 2-methoxyestradiol (2-MeO-E2) on long-term estrogen-deprived (LTED) cell proliferation. LTED cells were treated with 2-MeO-E2 (1 pM to 10  $\mu M$ ) for 72 (**upper panel**) or 96 h (**lower panel**). Control samples (controls) cells were treated with the vehicle. Data are presented as the mean  $\pm$  S.E. ( $n = 6$ ) percentage of the vehicle-treated control.

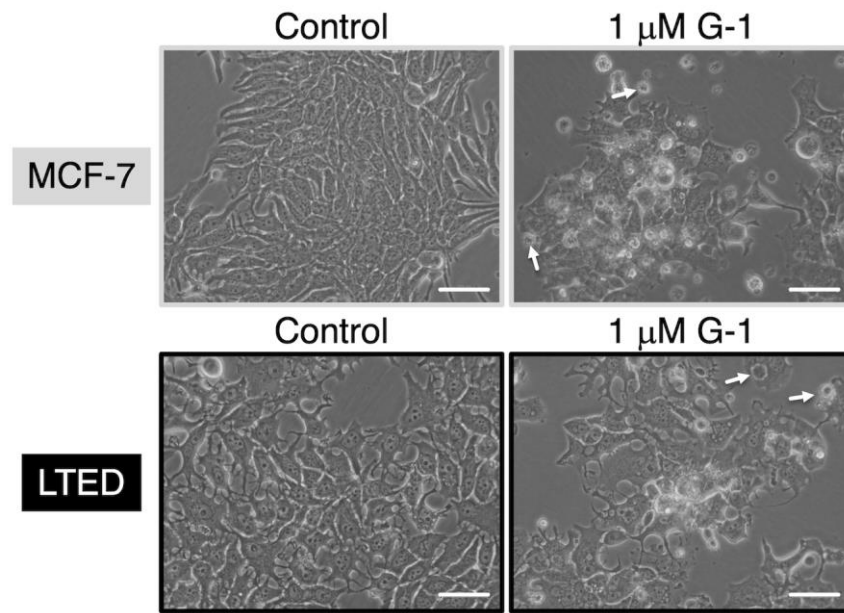

**Figure S2.** Effects of G-1 on MCF-7 and LTED cell morphology. Morphology of MCF-7 and LTED cells treated with 1  $\mu$ M G-1 for 48 h. The control sample was treated with the vehicle. Representative images are shown. Images were acquired at 400 $\times$  magnification. The scale bar represents 50  $\mu$ m. Some cell blebs are indicated by white arrows.

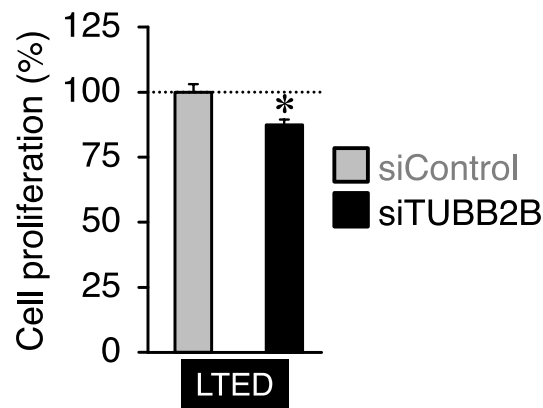

**Figure S3.** Effects of TUBB2B siRNA (siTUBB2B) on the proliferation of LTED cells. LTED cells were transfected with control siRNA (siControl) or siTUBB2B. Data are presented as the mean  $\pm$  S.E. ( $n = 6$ ) percentage of the siControl-transfected group. Significant differences (by Student's  $t$ -test) to the siControl-transfected group are marked with an asterisk (\* $P < 0.05$ ).
